# Supplementary material for: Single frequency analysis for clinical immunosensor design
Source: Royal Society of Chemistry journal article supplement (doi:10.1039/c5ra23783a), 2015-12-08
Supplement: c5ra23783a1.pdf [file c5ra23783a1.pdf]

## **Single Frequency Analysis for Clinical Immunosensor Design**

Burak Derkus<sup>a,\*</sup>, Mustafa Ozkan<sup>a</sup>, Kaan C. Emregul<sup>a</sup>, Emel Emregul<sup>a</sup>

<sup>a</sup>Bioelectrochemistry Lab, Department of Chemistry, Science Faculty, Ankara University,  
Tandoğan, Ankara 06100 Turkey

\*Corresponding author: burakderkus@gmail.com, Phone Number: +90 0312-212-60-40

### **Supplementary Materials**

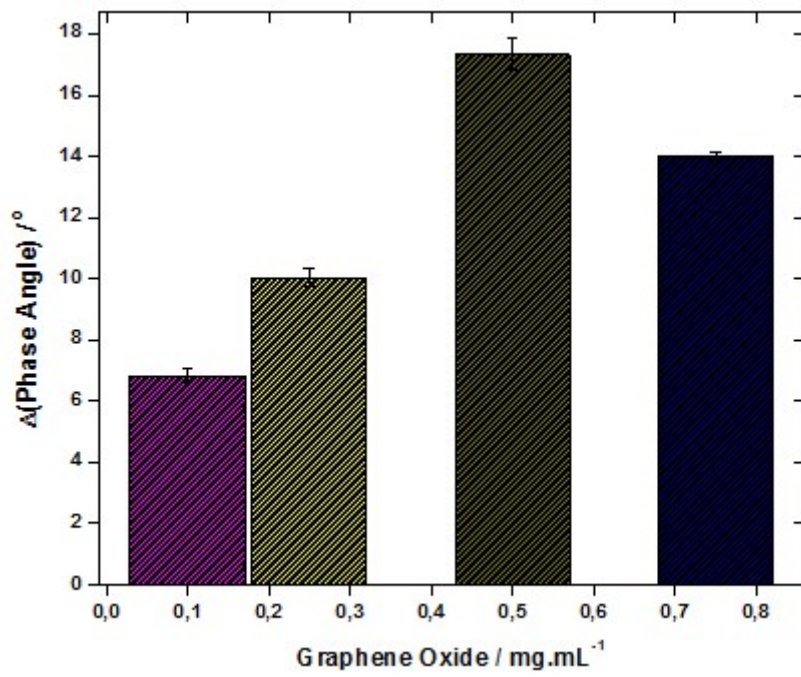

**Figure S1** Effect of GO on *GO-AlgNSp-Anti-Tau* immunosensor

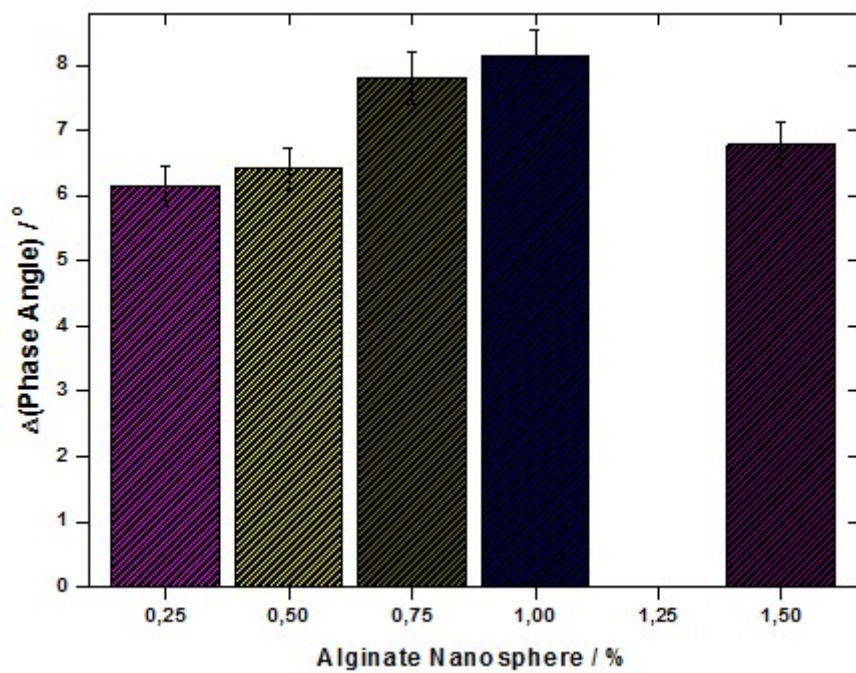

**Figure S2** Effect of AlgNSp on *GO-AlgNSp-Anti-Tau* immunosensor

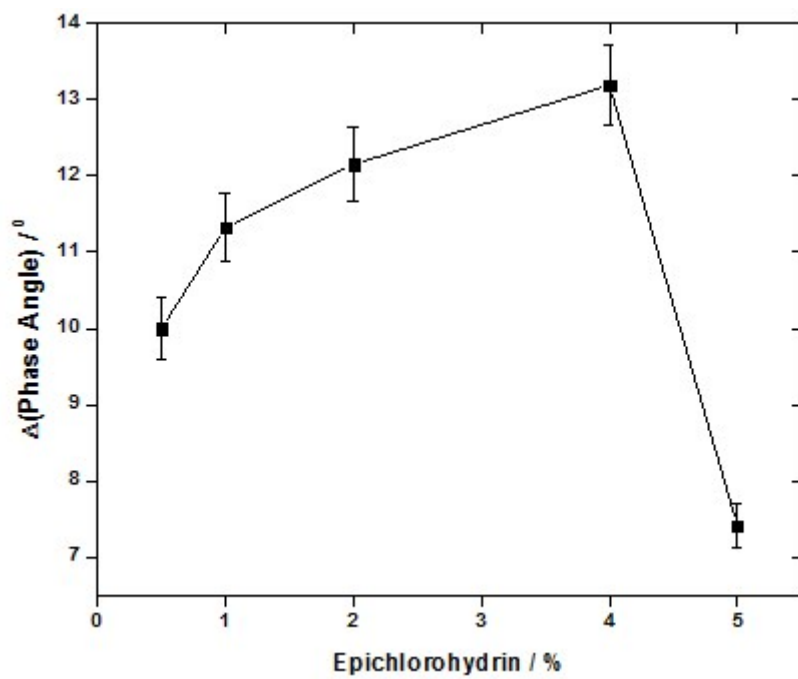

**Figure S3** Effect of ECH on *GO-AlgNSp-Anti-Tau* immunosensor

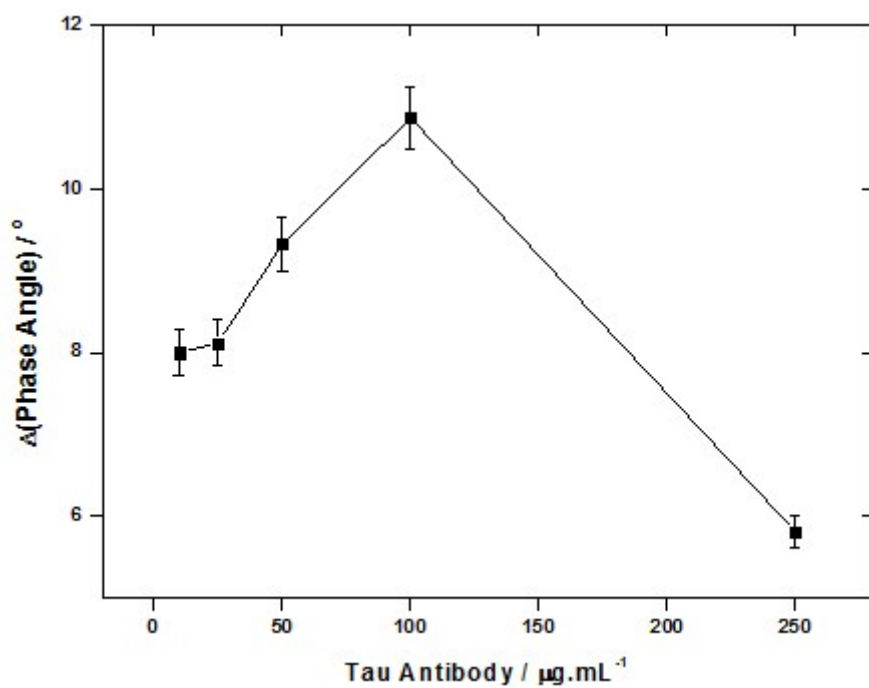

**Figure S4** Effect of Tau Antibody on *GO-AlgNSp-Anti-Tau* immunosensor

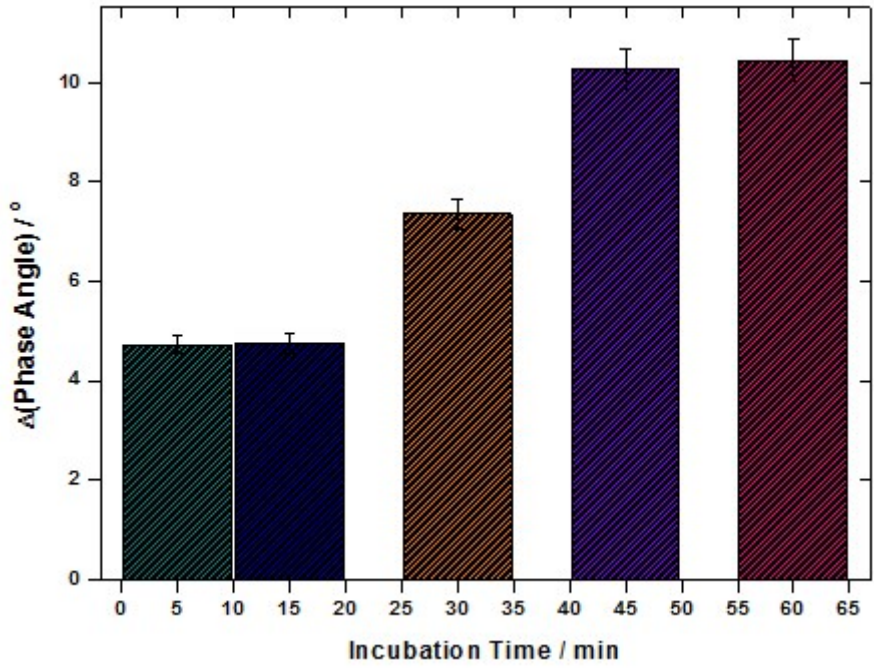

**Figure S5** Effect of incubation time on *GO-AlgNSp-Anti-Tau* immunosensor
